# Supplementary material
Source: MDPI journal article supplement (https://www.mdpi.com/1424-2818/15/3/345)
Supplement: s1 [file s1]

# Habitat and food preferences of beetles inhabiting caves in the Częstochowa Upland

| Family         | Species                                          | Food preferences | Habitat preferences                                                    |
|----------------|--------------------------------------------------|------------------|------------------------------------------------------------------------|
| Cantharidae    | <i>Rhagonycha gallica</i>                        |                  | deciduous forest                                                       |
| Carabidae      | <i>Abax ovalis</i>                               | zoophagous       | forest,<br>mesohigrophilic                                             |
| Carabidae      | <i>Abax parallelus</i>                           | zoophagous       | forest                                                                 |
| Carabidae      | <i>Calathus micropterus</i>                      | zoophagous       | forest,<br>mesohigrophilic                                             |
| Carabidae      | <i>Carabus arvensis</i>                          | zoophagous       | forest, open areas                                                     |
| Carabidae      | <i>Carabus coriaceus</i>                         | zoophagous       | forest,<br>mesohigrophilic                                             |
| Carabidae      | <i>Leistus ferrugineus</i>                       | zoophagous       | forest, higrophilic                                                    |
| Carabidae      | <i>Leistus rufomarginatus</i>                    |                  | forest                                                                 |
| Carabidae      | <i>Molops piceus</i>                             | zoophagous       | forest,<br>mesohigrophilic                                             |
| Carabidae      | <i>Pterostichus melanarius</i>                   | polyphagous      | open areas,<br>dryophilic                                              |
| Carabidae      | <i>Pterostichus niger</i>                        | zoophagous       | forest,<br>mesohigrophilic                                             |
| Carabidae      | <i>Pterostichus oblongopunctatus</i>             | zoophagous       | forest,<br>mesohigrophilic                                             |
| Carabidae      | <i>Trechus quadristriatus</i>                    | zoophagous       | open areas, in the<br>moss, among fallen<br>leaves,<br>mesohigrophilic |
| Cryptophagidae | <i>Cryptophagus distinguendus</i> Sturm,<br>1845 | mycophagous      | in farm buildings,<br>bird nests, and<br>rodent burrows                |

## Habitat and food preferences of beetles inhabiting caves in the Czysta Upland

|                |                                                                       |                    |                                                                  |
|----------------|-----------------------------------------------------------------------|--------------------|------------------------------------------------------------------|
| Cryptophagidae | <i>Cryptophagus montanus</i><br>Brisout, 1863 (= <i>C. deubeli</i> )  | mycophagous        | mountainous species, forest                                      |
| Cryptophagidae | <i>Cryptophagus pallidus</i><br>Sturm, 1845 (= <i>C. thomsoni</i> )   | mycophagous        | on trunks, branches, in tree hollows                             |
| Cryptophagidae | <i>Cryptophagus punctipennis</i> Brisout, 1861 (= <i>C. pilosus</i> ) | mycophagous        | forest, open areas, decaying plant debris                        |
| Cryptophagidae | <i>Cryptophagus reflexus</i><br>Rey, 1889 (= <i>C. pallidus</i> )     | mycophagous        | forest                                                           |
| Cryptophagidae | <i>Cryptophagus saginatus</i><br>Sturm, 1845                          | mycophagous        | forest, open areas                                               |
| Cryptophagidae | <i>Cryptophagus scutellatus</i><br>Newman, 1834                       | mycophagous        | compost, tree hollows in oak                                     |
| Cryptophagidae | <i>Cryptophagus</i> sp.                                               | mycophagous        |                                                                  |
| Curculionidae  | <i>Brachysomus echinatus</i>                                          | phytophagous       | Forest, open areas                                               |
| Curculionidae  | <i>Otiorhynchus scaber</i>                                            | phytophagous       | forest, rarely open areas                                        |
| Elateridae     | <i>Athous vittatus</i>                                                | phytophagous       | forest, meadow                                                   |
| Endomychidae   | <i>Mycetaea subterranea</i> (= <i>M. hirta</i> )                      | necrophagous       | tree hollow, caves                                               |
| Geotrupidae    | <i>Anoplotrupes stercorosus</i>                                       | phyto-saprophagous | forest                                                           |
| Histeridae     | <i>Ontophilus punctatus</i>                                           | saprophagous       | mammal nests                                                     |
| Hydrophilidae  | <i>Megasternum</i> cf. <i>concinuum</i>                               |                    | wetlands, decaying plant debris                                  |
| Lathridiidae   | <i>Cartodere nodifer</i>                                              |                    | synanthropic, found in farm buildings, rarely caught in forests, |

# Habitat and food preferences of beetles inhabiting caves in the Czeŝochowa Upland

|           |                                |              |                                                          |
|-----------|--------------------------------|--------------|----------------------------------------------------------|
|           |                                |              | alien species,<br>originally from<br>Australia           |
| Leiodidae | <i>Agathidium seminulum</i>    | mycophagous  | forest, rotten trees,<br>bracket fungus                  |
| Leiodidae | <i>Amphicyllis globus</i>      |              | decaying plant<br>debris                                 |
| Leiodidae | <i>Anisotoma humeralis</i>     | mycophagous  | on trunks, branches,<br>under the tree bark,<br>on fungi |
| Leiodidae | <i>Catops morio</i>            | saprophagous | near waters,<br>rodents' burrows                         |
| Leiodidae | <i>Catops neglectus</i>        | necrophagous | in burrows                                               |
| Leiodidae | <i>Catops tristis infernus</i> | saprophagous | subterranean                                             |
| Leiodidae | <i>Catops fuliginosus</i>      | necrophagous | mammal burrows,<br>cave' entrances                       |
| Leiodidae | <i>Catops fuscus</i>           | necrophagous | mammal burrow<br>and nests, stables,<br>basements        |
| Leiodidae | <i>Catops kirbyi</i>           | necrophagous | mammal burrows                                           |
| Leiodidae | <i>Catops nigricans</i>        | necrophagous | mammal burrows,<br>cave' entrances                       |
| Leiodidae | <i>Catops picipes</i>          | necrophagous | cave' entrances,<br>rarely mammal<br>burrows             |
| Leiodidae | <i>Catops subfuscus</i>        | necrophagous | cave' entrances,<br>rarely mammal<br>burrows             |
| Leiodidae | <i>Choleva bicolor</i>         | saprophagous | cave' entrances                                          |
| Leiodidae | <i>Choleva glauca</i>          | saprophagous | cave' entrances,<br>mole' burrows,<br>near the water     |

# Habitat and food preferences of beetles inhabiting caves in the Czeŝochowa Upland

|           |                                           |                        |                                                     |
|-----------|-------------------------------------------|------------------------|-----------------------------------------------------|
| Leiodidae | <i>Choleva oblonga</i>                    | saprophagous           | forest, open areas,<br>rarely caves                 |
| Leiodidae | <i>Choleva agilis</i>                     | saprophagous           | near the water,<br>rodents' burrows                 |
| Leiodidae | <i>Choleva cisteloides</i>                | saprophagous           | decaying plant<br>debris, MSS, cave'<br>entrances   |
| Leiodidae | <i>Choleva lederiana<br/>gracilenta</i>   | saprophagous           | caves                                               |
| Leiodidae | <i>Choleva nivalis</i>                    | saprophagous           | decaying plant<br>debris, MSS, cave'<br>entrances   |
| Leiodidae | <i>Choleva paskoviensis</i>               | saprophagous           | rodent' burrows                                     |
| Leiodidae | <i>Choleva spadicea</i>                   | saprophagous           | mole and rodent'<br>burrows, caves                  |
| Leiodidae | <i>Choleva sturmi</i>                     | saprophagous           | mammal burrows                                      |
| Leiodidae | <i>Colenis immunda</i>                    | mycophagous            | mosses, fungi                                       |
| Leiodidae | <i>Nargus velox</i>                       | saprophagous           | mammal burrows,<br>rarely nests                     |
| Leiodidae | <i>Nargus wilkini</i>                     | phyto-<br>saprophagous | forest litter,<br>sometimes burrows                 |
| Leiodidae | <i>Nemadus colonoides</i>                 | saprophagous           | nests and burrows                                   |
| Leiodidae | <i>Ptomaphagus sericatus</i>              | necrophagous           | decaying beech,<br>forest litter, rodent<br>burrows |
| Leiodidae | <i>Ptomaphagus sp.</i>                    | necrophagous           | decaying beech,<br>forest litter, rodent<br>burrows |
| Leiodidae | <i>Speonomus normandi<br/>hydrophilus</i> | saprophagous           | Caves, MSS                                          |

# Habitat and food preferences of beetles inhabiting caves in the Czeŝochowa Upland

|               |                                 |                                       |                                                                                     |
|---------------|---------------------------------|---------------------------------------|-------------------------------------------------------------------------------------|
| Monotomidae   | <i>Rhizophagus bipustulatus</i> | zoophagous<br>mycophagous             | Under the bark                                                                      |
| Ptinidae      | <i>Ptinus fur</i>               | phyto-<br>saprophagous                | bird nests, old<br>beehives                                                         |
| Scarabaeidae  | <i>Serica brunnea</i>           | phyto-<br>saprophagous                | under the stones,<br>ground layer of soil                                           |
| Scydmenidae   | <i>Neuraphes talparum</i>       |                                       | mole burrows                                                                        |
| Staphylinidae | <i>Acidota cruentata</i>        |                                       | Rodent burrows,<br>under the mosses,<br>forest                                      |
| Staphylinidae | <i>Anotylus inustus</i>         | phyto-<br>saprophagous                | xerothermic sites,<br>under decaying<br>plant debris,<br>dryophilic                 |
| Staphylinidae | <i>Anotylus sculpturatus</i>    | saprophagous,<br>also<br>coprophagous | under rotting plant<br>debris, carrion, on<br>fungi, sometimes in<br>rodent burrows |
| Staphylinidae | <i>Anthobium atrocephalum</i>   |                                       | forest, decaying<br>plant debris                                                    |
| Staphylinidae | <i>Atheta crassicornis</i>      |                                       | forest, fungi and<br>humus                                                          |
| Staphylinidae | <i>Atheta fungi</i>             |                                       | decaying plant<br>debris, fungi and                                                 |
| Staphylinidae | <i>Atheta gyllenhalii</i>       |                                       | marsh, under<br>rotting plant debris<br>or in <i>Sphagnum</i>                       |
| Staphylinidae | <i>Atheta ravilla</i>           |                                       | decaying plant<br>debris, humus, on<br>fungi                                        |
| Staphylinidae | <i>Atheta sodalis</i>           |                                       | decaying plant<br>debris                                                            |
| Staphylinidae | <i>Autalia longicornis</i>      | mycophagous                           | forest, fungi                                                                       |

# Habitat and food preferences of beetles inhabiting caves in the Czeŝochowa Upland

|               |                                |                        |                                                              |
|---------------|--------------------------------|------------------------|--------------------------------------------------------------|
| Staphylinidae | <i>Bryaxis puncticollis</i>    |                        | forest, mosses,<br>under fallen leaves                       |
| Staphylinidae | <i>Bryophacis crassicornis</i> |                        | forest and moors,<br>under moss, and in<br>rotten bark       |
| Staphylinidae | <i>Bythinus macropalpus</i>    |                        | humid places near<br>water, under moss                       |
| Staphylinidae | <i>Dinaraea angustula</i>      |                        | forest, under the<br>bark                                    |
| Staphylinidae | <i>Dinothenarus fossor</i>     | zoophagous             | litter and soil                                              |
| Staphylinidae | <i>Domene scabricollis</i>     |                        | forest, especially<br>beech                                  |
| Staphylinidae | <i>Gabrius breviventer</i>     |                        | forest, open areas,<br>under mosses                          |
| Staphylinidae | <i>Ischnosoma longicorne</i>   |                        | forest, peatbog,                                             |
| Staphylinidae | <i>Lesteva longoelytrata</i>   |                        | bank of water,<br>under fallen leaves,<br>under stones       |
| Staphylinidae | <i>Liogluta alpestris</i>      |                        | under fallen leaves,<br>rotten wood                          |
| Staphylinidae | <i>Mycetoporus clavicornis</i> |                        | forest, fungi, humus                                         |
| Staphylinidae | <i>Ocalea picata</i>           |                        | bank of water,<br>forest                                     |
| Staphylinidae | <i>Ocypus macrocephalus</i>    | zoophagous             | litter and soil                                              |
| Staphylinidae | <i>Omalius caesum</i>          | phyto-<br>saprophagous | forest, under debris,<br>in bird nests and<br>rodent burrows |
| Staphylinidae | <i>Omalius excavatum</i>       | phyto-<br>saprophagous | rotting straw,<br>compost,<br>sometimes caves                |

# Habitat and food preferences of beetles inhabiting caves in the Czeŝochowa Upland

|               |                                            |                             |                                                                      |
|---------------|--------------------------------------------|-----------------------------|----------------------------------------------------------------------|
| Staphylinidae | <i>Omalius rivulare</i>                    | saprophagous<br>mycophagous | decaying plant and<br>animal debris                                  |
| Staphylinidae | <i>Omalius validum</i>                     | zoophagous                  | undergrounds, in<br>the mammal<br>burrows, caves                     |
| Staphylinidae | <i>Othius punctulatus</i>                  | zoophagous                  | forest, under fallen<br>leaves, under<br>stones, in moss             |
| Staphylinidae | <i>Othius subuliformis</i>                 | zoophagous                  | forest, in litter,<br>moss, under stones                             |
| Staphylinidae | <i>Oxypoda acuminata</i>                   |                             | under rotting<br>debris, in moss                                     |
| Staphylinidae | <i>Oxypoda annularis</i>                   |                             | peat bogs, under<br>moss, rotting wood,<br>sometimes in ant<br>nests |
| Staphylinidae | <i>Oxypoda praecox</i>                     |                             | rodent and mole<br>burrows, tree<br>hollows                          |
| Staphylinidae | <i>Philonthus decorus</i>                  | zoophagous                  | forest, moss, fungi,<br>fallen leaves                                |
| Staphylinidae | <i>Phloeonomus<br/>punctipennis</i>        |                             | under the bark                                                       |
| Staphylinidae | <i>Proteinus brachypterus</i>              | zoophagous                  | Fungi, decaying<br>fungi, fallen leaves                              |
| Staphylinidae | <i>Quedius limbatus</i>                    |                             | Forest, peat bogs,<br>under moss, fallen<br>leaves                   |
| Staphylinidae | <i>Quedius mesomelinus<br/>mesomelinus</i> |                             | undergrounds,<br>caves, under the<br>litter                          |
| Staphylinidae | <i>Sepedophilus marshami</i>               |                             | forest                                                               |
| Staphylinidae | <i>Staphylinus<br/>erythropterus</i>       | zoophagous                  | forest                                                               |
| Staphylinidae | <i>Syntomium aeneum</i>                    |                             | forest, under the<br>moss, higrophilic                               |

## Habitat and food preferences of beetles inhabiting caves in the Czeŝochowa Upland

|               |                                                      |                        |                                                        |
|---------------|------------------------------------------------------|------------------------|--------------------------------------------------------|
| Staphylinidae | <i>Tachinus subterraneus</i>                         |                        | forest, peat bogs,<br>under the moss,<br>fallen leaves |
| Staphylinidae | <i>Xantholinus laevigatus</i>                        | phyto-<br>saprophagous | Forest, especially<br>montanous,<br>higrophilic        |
| Staphylinidae | <i>Xantholinus linearis</i>                          | phyto-<br>saprophagous | forest, tree hollow,<br>mole burrows,<br>dryophilic    |
| Staphylinidae | <i>Xantholinus longiventris</i><br><i>Heer, 1839</i> | phyto-<br>saprophagous | Forest, higrophilic                                    |
