# Supplementary material
Source: MDPI journal article supplement (https://www.mdpi.com/1424-2818/15/3/345)
Supplement: s1 [file s1]

A list of sampled species with their ecological classification

| Ecological classification   | Number of species | Species                                                    | Family         |
|-----------------------------|-------------------|------------------------------------------------------------|----------------|
| TROGLOBIONT                 | 3                 | <i>Catops tristis infernus</i> Szymczakowski, 1957         | Leiodidae      |
|                             |                   | <i>Choleva lederiana gracilentia</i> Szymczakowski, 1957   | Leiodidae      |
|                             |                   | <i>Speonomus hydrophilus</i> Jeannel, 1907                 | Leiodidae      |
| EUTROGLOPHILE               | 4                 | <i>Catops picipes</i> (Fabricius, 1787)                    | Leiodidae      |
|                             |                   | <i>Omalius validum</i> Kraatz, 1857                        | Staphylinidae  |
|                             |                   | <i>Tachinus subterraneus</i> (Linnaeus, 1758)              | Staphylinidae  |
|                             |                   | <i>Quedius mesomelinus mesomelinus</i> (Marsham, 1802)     | Staphylinidae  |
| SUBTROGLOPHILE/ MSS SPECIES | 32                | <i>Anthobium atrocephalum</i> (Gyllenhal, 1810)            | Staphylinidae  |
|                             |                   | <i>Atheta sodalis</i> (Erichson, 1837)                     | Staphylinidae  |
|                             |                   | <i>Catops fuscus</i> (Panzer, 1794)                        | Leiodidae      |
|                             |                   | <i>Catops morio</i> (Fabricius, 1787)                      | Leiodidae      |
|                             |                   | <i>Catops neglectus</i> E.G. Kraatz, 1852                  | Leiodidae      |
|                             |                   | <i>Catops nigricans</i> (Spence, 1813)                     | Leiodidae      |
|                             |                   | <i>Catops fuliginosus</i> W.F. Erichson, 1837              | Leiodidae      |
|                             |                   | <i>Catops kirbyi</i> (Spence, 1813)                        | Leiodidae      |
|                             |                   | <i>Catops subfuscus</i> Kellner, 1846                      | Leiodidae      |
|                             |                   | <i>Choleva bicolor</i> Jeannel, 1923                       | Leiodidae      |
|                             |                   | <i>Choleva glauca</i> Britten, 1918                        | Leiodidae      |
|                             |                   | <i>Choleva agilis</i> (J.K.W. Illiger, 1798)               | Leiodidae      |
|                             |                   | <i>Choleva oblonga</i> Latreille, 1806                     | Leiodidae      |
|                             |                   | <i>Choleva cisteloides</i> (Frölich, 1799)                 | Leiodidae      |
|                             |                   | <i>Choleva nivalis</i> (E.G. Kraatz, 1856)                 | Leiodidae      |
|                             |                   | <i>Choleva paskoviensis</i> E. Reitter, 1913               | Leiodidae      |
|                             |                   | <i>Choleva spadicea</i> (J. Sturm, 1839)                   | Leiodidae      |
|                             |                   | <i>Choleva sturmii</i> Ch.N.F. Brisout de Barneville, 1863 | Leiodidae      |
|                             |                   | <i>Cryptophagus distinguendus</i> J. Sturm, 1845           | Cryptophagidae |
|                             |                   | <i>Cryptophagus scutellatus</i> L. Newman, 1834            | Cryptophagidae |

A list of sampled species with their ecological classification

|            |    |                                                  |               |
|------------|----|--------------------------------------------------|---------------|
| TROGLOXENE |    | <i>Mycetaea subterranea</i> (Fabricius, 1801)    | Endomychidae  |
|            |    | <i>Nargus velox</i> (Spence, 1813)               | Leiodidae     |
|            |    | <i>Nargus wilkinii</i> (Spence, 1815)            | Leiodidae     |
|            |    | <i>Nemadus colonoides</i> (E.G. Kraatz, 1851)    | Leiodidae     |
|            |    | <i>Neuraphes talparum</i> Lokay, 1920            | Scydmenidae   |
|            |    | <i>Omalium caesum</i> Gravenhorst, 1806          | Staphylinidae |
|            |    | <i>Omalium excavatum</i> Stephens, 1834          | Staphylinidae |
|            |    | <i>Omalium rivulare</i> (Paykull, 1789)          | Staphylinidae |
|            |    | <i>Othius punctulatus</i> (Goeze, 1777)          | Staphylinidae |
|            |    | <i>Othius subuliformis</i> Stephens, 1833        | Staphylinidae |
|            |    | <i>Ptomaphagus sericatus</i> Chaudoir, 1845      | Leiodidae     |
|            |    | <i>Quedius limbatus</i> (Heer, 1839)             | Staphylinidae |
|            |    | <i>Syntomium aeneum</i> (Müller, 1821)           | Staphylinidae |
|            | 66 | <i>Abax ovalis</i> (C. Duftschmid, 1812)         | Carabidae     |
|            |    | <i>Abax parallelus</i> (C. Duftschmid, 1812)     | Carabidae     |
|            |    | <i>Acidota cruentata</i> Mannerheim, 1830        | Staphylinidae |
|            |    | <i>Agathidium seminulum</i> (Linnaeus, 1758)     | Leiodidae     |
|            |    | <i>Amphicyllis globus</i> (Fabricius, 1792)      | Leiodidae     |
|            |    | <i>Anisotoma humeralis</i> (J.F.W. Herbst, 1791) | Leiodidae     |
|            |    | <i>Anoplotrupes stercorosus</i> (Scriba, 1791)   | Geotrupidae   |
|            |    | <i>Anotylus inustus</i> (Gravenhorst, 1806)      | Staphylinidae |
|            |    | <i>Anotylus sculpturatus</i> (Gravenhorst, 1806) | Staphylinidae |
|            |    | <i>Atheta crassicornis</i> (Fabricius, 1793)     | Staphylinidae |
|            |    | <i>Atheta fungi</i> (Gravenhorst, 1806)          | Staphylinidae |
|            |    | <i>Atheta gyllenhalii</i> (Thomson, 1856)        | Staphylinidae |
|            |    | <i>Atheta ravilla</i> (Erichson, 1839)           | Staphylinidae |
|            |    | <i>Athous vittatus</i> (Fabricius, 1792)         | Elateridae    |
|            |    | <i>Autalia longicornis</i> Scheerpeltz, 1947     | Staphylinidae |
|            |    | <i>Brachysomus echinatus</i> (Bonsdorff, 1785)   | Curculionidae |
|            |    | <i>Bryaxis puncticollis</i> (Denny, 1825)        | Staphylinidae |
|            |    | <i>Bryophacis crassicornis</i> (Mäklin, 1847)    | Staphylinidae |
|            |    | <i>Bythinus macropalpus</i> Aubé, 1833           | Staphylinidae |

A list of sampled species with their ecological classification

|  |                                                                      |                |
|--|----------------------------------------------------------------------|----------------|
|  | <i>Calathus micropterus</i> (C. Duftschmid, 1812)                    | Carabidae      |
|  | <i>Carabus arvensis</i> Herbst, 1784                                 | Carabidae      |
|  | <i>Carabus coriaceus</i> Linnaeus, 1758                              | Carabidae      |
|  | <i>Cartodere nodifer</i> (J.O. Westwood, 1839)                       | Lathridiidae   |
|  | <i>Colenis immunda</i> (J. Sturm, 1807)                              | Leiodidae      |
|  | <i>Cryptophagus montanus</i> Ch.N.F. Brisout de Barneville, 1863     | Cryptophagidae |
|  | <i>Cryptophagus pallidus</i> J. Sturm, 1845                          | Cryptophagidae |
|  | <i>Cryptophagus punctipennis</i> Ch.N.F. Brisout de Barneville, 1863 | Cryptophagidae |
|  | <i>Cryptophagus reflexus</i> C. Rey, 1889                            | Cryptophagidae |
|  | <i>Cryptophagus saginatus</i> J. Sturm, 1845                         | Cryptophagidae |
|  | <i>Dinaraea angustula</i> (Gyllenhal, 1810)                          | Staphylinidae  |
|  | <i>Dinothenarus fossor</i> (Scopoli, 1771)                           | Staphylinidae  |
|  | <i>Domene scabricollis</i> (Erichson, 1840)                          | Staphylinidae  |
|  | <i>Euconnus</i> sp. C.G. Thomson, 1859                               | Scydmaenidae   |
|  | <i>Gabrius breviventer</i> (Sperk, 1835)                             | Staphylinidae  |
|  | <i>Ischnosoma longicorne</i> (Mäklin, 1847)                          | Staphylinidae  |
|  | <i>Leiodes</i> sp. Latreille, 1797                                   | Leiodidae      |
|  | <i>Leistus ferrugineus</i> (Linnaeus, 1758)                          | Carabidae      |
|  | <i>Leistus rufomarginatus</i> (C. Duftschmid, 1812)                  | Carabidae      |
|  | <i>Lesteva longoelytrata</i> (Goeze, 1777)                           | Staphylinidae  |
|  | <i>Liogluta alpestris</i> (Heer, 1839)                               | Staphylinidae  |
|  | <i>Megasternum concinuum</i> (Th. Marsham, 1802)                     | Hydrophilidae  |
|  | <i>Molops piceus</i> (Panzer, 1793)                                  | Carabidae      |
|  | <i>Mycetoporus clavicornis</i> (Stephens, 1832)                      | Staphylinidae  |
|  | <i>Ocalea picata</i> (Stephens, 1832)                                | Staphylinidae  |
|  | <i>Ocypus macrocephalus</i> (Gravenhorst, 1802)                      | Staphylinidae  |
|  | <i>Onthophilus punctatus</i> (O.F. Müller, 1776)                     | Histeridae     |
|  | <i>Otiorhynchus scaber</i> (Linnaeus, 1758)                          | Curculionidae  |
|  | <i>Oxypoda acuminata</i> (Stephens, 1832)                            | Staphylinidae  |
|  | <i>Oxypoda annularis</i> (Mannerheim, 1830)                          | Staphylinidae  |

A list of sampled species with their ecological classification

|  |  |                                                        |               |
|--|--|--------------------------------------------------------|---------------|
|  |  | <i>Oxypoda praecox</i> Erichson, 1839                  | Staphylinidae |
|  |  | <i>Philonthus decorus</i> (Gravenhorst, 1802)          | Staphylinidae |
|  |  | <i>Phloeonomus punctipennis</i> Thomson, 1867          | Staphylinidae |
|  |  | <i>Proteinus brachypterus</i> (Fabricius, 1792)        | Staphylinidae |
|  |  | <i>Pterostichus melanarius</i> (J.K.W. Illiger, 1798)  | Carabidae     |
|  |  | <i>Pterostichus niger</i> (Schaller, 1783)             | Carabidae     |
|  |  | <i>Pterostichus oblongopunctatus</i> (Fabricius, 1787) | Carabidae     |
|  |  | <i>Ptinus fur</i> (Linnaeus, 1758)                     | Ptinidae      |
|  |  | <i>Rhagonycha gallica</i> Pic, 1923                    | Cantharidae   |
|  |  | <i>Rhizophagus bipustulatus</i> (Fabricius, 1792)      | Monotomidae   |
|  |  | <i>Sepedophilus marshami</i> (Stephens, 1832)          | Staphylinidae |
|  |  | <i>Serica brunnea</i> (Linnaeus, 1758)                 | Scarabaeidae  |
|  |  | <i>Staphylinus erythropterus</i> Linnaeus, 1758        | Staphylinidae |
|  |  | <i>Stenichnus</i> sp. C.G. Thomson, 1859               | Scydmenidae   |
|  |  | <i>Xantholinus laevigatus</i> Jacobsen, 1849           | Staphylinidae |
|  |  | <i>Xantholinus linearis</i> (Olivier, 1795)            | Staphylinidae |
|  |  | <i>Xantholinus longiventris</i> Heer, 1839             | Staphylinidae |
