# Supplementary material
Source: MDPI journal article supplement (https://www.mdpi.com/1424-2818/15/3/345)
Supplement: s1 [file s1]

| Cave name        | Zone | Species                              | Number of sampled specimens |
|------------------|------|--------------------------------------|-----------------------------|
| W ZIELONEJ GÓRZE | S0   | <i>Abax ovalis</i>                   | 1                           |
|                  |      | <i>Anemadus strigosus</i>            | 1                           |
|                  |      | <i>Anoplotrupes stercorosus</i>      | 22                          |
|                  |      | <i>Catops fuliginosus</i>            | 1                           |
|                  |      | <i>Catops picipes</i>                | 7                           |
|                  |      | <i>Catops subfuscus</i>              | 1                           |
|                  |      | <i>Cryptophagus distinguendus</i>    | 1                           |
|                  |      | <i>Cryptophagus montanus</i>         | 1                           |
|                  |      | <i>Cryptophagus pallidus</i>         | 4                           |
|                  |      | <i>Cryptophagus punctipennis</i>     | 4                           |
|                  |      | <i>Cryptophagus sp.</i>              | 2                           |
|                  |      | <i>Cychrus caraboides</i>            | 1                           |
|                  |      | <i>Mycetaea subterranea</i>          | 36                          |
|                  |      | <i>Omalium caesum</i>                | 3                           |
|                  |      | <i>Othius punctulatus</i>            | 1                           |
|                  |      | <i>Otiorhynchus raucus</i>           | 1                           |
|                  |      | <i>Pterostichus melanarius</i>       | 7                           |
|                  |      | <i>Pterostichus oblongopunctatus</i> | 1                           |
|                  |      | <i>Ptomaphagus sericatus</i>         | 2                           |
|                  |      | <i>Ptomaphagus varricornis</i>       | 1                           |
|                  |      | <i>Sciodrepoides watsoni</i>         | 1                           |
|                  |      | <i>Tasgius morsitans</i>             | 6                           |
|                  |      | <i>Xantholinus tricolor</i>          | 1                           |
|                  | S1   | <i>Anoplotrupes stercorosus</i>      | 1                           |
|                  |      | <i>Anthobium atrocephalum</i>        | 3                           |
|                  |      | <i>Atheta crassicornis</i>           | 1                           |
|                  |      | <i>Atheta fungi</i>                  | 1                           |
|                  |      | <i>Atheta ravilla</i>                | 1                           |
|                  |      | <i>Atheta sodalis</i>                | 3                           |
|                  |      | <i>Autalia longicornis</i>           | 1                           |
|                  |      | <i>Catops fuliginosus</i>            | 4                           |
|                  |      | <i>Catops picipes</i>                | 11                          |
|                  |      | <i>Choleva cisteloides</i>           | 1                           |
|                  |      | <i>Choleva sturmi</i>                | 1                           |
|                  |      | <i>Cryptophagus distinguendus</i>    | 18                          |
|                  |      | <i>Cryptophagus pallidus</i>         | 1                           |
|                  |      | <i>Cryptophagus punctipennis</i>     | 67                          |
|                  |      | <i>Liogluta alpestris</i>            | 1                           |
|                  |      | <i>Mycetaea subterranea</i>          | 1                           |
|                  |      | <i>Mycetoporus clavicornis</i>       | 1                           |
|                  |      | <i>Omalium caesum</i>                | 5                           |
|                  |      | <i>Omalium excavatum</i>             | 1                           |
|                  |      | <i>Omalium rivulare</i>              | 6                           |
|                  |      | <i>Othius subuliformis</i>           | 1                           |
|                  |      | <i>Oxypoda annularis</i>             | 1                           |
|                  |      | <i>Ptomaphagus sericatus</i>         | 1                           |

|         |    |                                        |    |
|---------|----|----------------------------------------|----|
|         |    | <i>Quedius mesomelinus mesomelinus</i> | 8  |
|         |    | <i>Rhagonycha garlica</i>              | 1  |
|         |    | <i>Rhizophagus bipustulatus</i>        | 1  |
|         |    | <i>Serrica brunnea</i>                 | 1  |
|         |    | <i>Staphylinus erythropterus</i>       | 1  |
|         |    | <i>Tachinus subterraneus</i>           | 3  |
|         |    | <i>Xantholinus longiventris</i>        | 1  |
|         | S2 | <i>Catops nigricans</i>                | 1  |
|         |    | <i>Catops picipes</i>                  | 3  |
|         |    | <i>Cryptophagus distinguendus</i>      | 41 |
|         |    | <i>Cryptophagus pallidus</i>           | 1  |
|         |    | <i>Cryptophagus punctipennis</i>       | 5  |
|         |    | <i>Mycetaea subterranea</i>            | 1  |
|         |    | <i>Omalium caesum</i>                  | 1  |
|         |    | <i>Ptinus fur</i>                      | 1  |
|         |    | <i>Quedius mesomelinus mesomelinus</i> | 7  |
|         |    | <i>Tachinus subterraneus</i>           | 1  |
|         | S3 | <i>Catops picipes</i>                  | 2  |
|         |    | <i>Cryptophagus distinguendus</i>      | 9  |
|         |    | <i>Cryptophagus punctipennis</i>       | 1  |
|         |    | <i>Cryptophagus punctipennis</i>       | 1  |
|         |    | <i>Quedius mesomelinus mesomelinus</i> | 17 |
|         |    | <i>Tachinus subterraneus</i>           | 1  |
| TOWARNA | S0 | <i>Acidota cruentata</i>               | 2  |
|         |    | <i>Anoplotrupes stercorosus</i>        | 1  |
|         |    | <i>Anthobium atrocephalum</i>          | 2  |
|         |    | <i>Atheta fungi</i>                    | 2  |
|         |    | <i>Atheta ravilla</i>                  | 1  |
|         |    | <i>Bembidion lampros</i>               | 1  |
|         |    | <i>Brachypera zoilus</i>               | 1  |
|         |    | <i>Brachypera zoilus</i>               | 1  |
|         |    | <i>Brachypterus glaber</i>             | 1  |
|         |    | <i>Byrrhus pustulatus</i>              | 1  |
|         |    | <i>Calathus fuscipes</i>               | 10 |
|         |    | <i>Carabus convexus</i>                | 1  |
|         |    | <i>Carabus nemoralis</i>               | 3  |
|         |    | <i>Catops sp.</i>                      | 1  |
|         |    | <i>Ceratapion penetrans</i>            | 1  |
|         |    | <i>Chrysolina cerealis</i>             | 1  |
|         |    | <i>Drusilla canaliculata</i>           | 1  |
|         |    | <i>Enicmus transversus</i>             | 1  |
|         |    | <i>Falagrioma thoracica</i>            | 9  |
|         |    | <i>Glocianus punctiger</i>             | 1  |
|         |    | <i>Harpalus laevipes</i>               | 1  |
|         |    | <i>Harpalus latus</i>                  | 1  |
|         |    | <i>Harpalus rufipalpis</i>             | 1  |
|         |    | <i>Harpalus rufipes</i>                | 1  |

|  |    |                                        |   |
|--|----|----------------------------------------|---|
|  |    | <i>Harpalus tardus</i>                 | 2 |
|  |    | <i>Leiodes sp.</i>                     | 2 |
|  |    | <i>Leistus ferrugineus</i>             | 3 |
|  |    | <i>Leptusa fumida</i>                  | 1 |
|  |    | <i>Limobius borealis</i>               | 1 |
|  |    | <i>Liogluta alpestris</i>              | 3 |
|  |    | <i>Lycoperdina succinata</i>           | 1 |
|  |    | <i>Meligathes haemorrhidalis</i>       | 1 |
|  |    | <i>Ocalea picata</i>                   | 2 |
|  |    | <i>Omalius caesum</i>                  | 1 |
|  |    | <i>Otiorhynchus ovatus</i>             | 3 |
|  |    | <i>Otiorhynchus tristis</i>            | 1 |
|  |    | <i>Pella limbata</i>                   | 1 |
|  |    | <i>Pterostichus niger</i>              | 8 |
|  |    | <i>Ptinus sp.</i>                      | 1 |
|  |    | <i>Quedius picipennis picipennis</i>   | 1 |
|  |    | <i>Rhagonycha fulva</i>                | 1 |
|  |    | <i>Rugilus orbiculatus</i>             | 1 |
|  |    | <i>Sepedophilus obtusus</i>            | 3 |
|  |    | <i>Stenocarus cardui</i>               | 1 |
|  |    | <i>Stenus impressus</i>                | 1 |
|  |    | <i>Strophosoma melanogrammum</i>       | 2 |
|  |    | <i>Syntomus truncatellus</i>           | 1 |
|  |    | <i>Tachinus corticinus</i>             | 1 |
|  |    | <i>Tachyporus pusillus</i>             | 1 |
|  |    | <i>Tasgius melanarius</i>              | 3 |
|  |    | <i>Trachyphloeus aristatus</i>         | 1 |
|  |    | <i>Trachyphloeus spinimanus</i>        | 1 |
|  |    | <i>Tychius aureolus</i>                | 1 |
|  |    | <i>Xantholinus linearis</i>            | 6 |
|  | S1 | <i>Acidota cruentata</i>               | 2 |
|  |    | <i>Brachysomus echinatus</i>           | 1 |
|  |    | <i>Calathus micropterus</i>            | 1 |
|  |    | <i>Cartodere nodifer</i>               | 1 |
|  |    | <i>Catops fuscus</i>                   | 1 |
|  |    | <i>Catops nigricans</i>                | 1 |
|  |    | <i>Catops picipes</i>                  | 1 |
|  |    | <i>Cryptophagus reflexus</i>           | 2 |
|  |    | <i>Cryptophagus saginatus</i>          | 1 |
|  |    | <i>Cryptophagus scutellatus</i>        | 6 |
|  |    | <i>Neuraphes talparum</i>              | 1 |
|  |    | <i>Oxypoda praecox</i>                 | 1 |
|  |    | <i>Pterostichus niger</i>              | 1 |
|  |    | <i>Ptinus fur</i>                      | 1 |
|  |    | <i>Quedius mesomelinus mesomelinus</i> | 2 |
|  |    | <i>Rhizophagus bipustulatus</i>        | 4 |
|  |    | <i>Sepedophilus marshami</i>           | 1 |

|            |    |                                        |      |
|------------|----|----------------------------------------|------|
|            |    | <i>Speonomus normandi hydrophilus</i>  | 6    |
|            |    | <i>Stenichnus sp.</i>                  | 1    |
|            |    | <i>Xantholinus linearis</i>            | 2    |
|            | S2 | <i>Catops nigricans</i>                | 2    |
|            |    | <i>Catops picipes</i>                  | 2    |
|            |    | <i>Cryptophagus distinguendus</i>      | 1    |
|            |    | <i>Cryptophagus saginatus</i>          | 3    |
|            |    | <i>Cryptophagus scutellatus</i>        | 9    |
|            |    | <i>Speonomus normandi hydrophilus</i>  | 62   |
|            | S3 | <i>Calathus micropterus</i>            | 2    |
|            |    | <i>Catops nigricans</i>                | 1    |
|            |    | <i>Choleva paskoviensis</i>            | 1    |
|            |    | <i>Cryptophagus scutellatus</i>        | 7    |
|            |    | <i>Ontophilus punctatus</i>            | 1    |
|            |    | <i>Quedius mesomelinus mesomelinus</i> | 8    |
|            |    | <i>Speonomus normandi hydrophilus</i>  | 1052 |
| POD SOKOLĄ | S0 | <i>Abax ovalis</i>                     | 1    |
|            |    | <i>Anisotoma humeralis</i>             | 1    |
|            |    | <i>Anthobium atrocephalum</i>          | 1    |
|            |    | <i>Atheta crassicornis</i>             | 1    |
|            |    | <i>Atheta fungi</i>                    | 1    |
|            |    | <i>Atheta sodalis</i>                  | 2    |
|            |    | <i>Carabus intricatus</i>              | 1    |
|            |    | <i>Cartodere nodifer</i>               | 1    |
|            |    | <i>Catops picipes</i>                  | 1    |
|            |    | <i>Ischnosoma longicorne</i>           | 1    |
|            |    | <i>Omalium caesum</i>                  | 2    |
|            |    | <i>Pterostichus melanarius</i>         | 1    |
|            |    | <i>Trichotichnus nitens</i>            | 1    |
|            | S1 | <i>Anisotoma humeralis</i>             | 1    |
|            |    | <i>Anthobium atrocephalum</i>          | 3    |
|            |    | <i>Atheta gyllenhalii</i>              | 1    |
|            |    | <i>Atheta ravilla</i>                  | 1    |
|            |    | <i>Atheta sodalis</i>                  | 14   |
|            |    | <i>Autalia longicornis</i>             | 1    |
|            |    | <i>Bryophacis crassicornis</i>         | 1    |
|            |    | <i>Catops fuscus</i>                   | 1    |
|            |    | <i>Catops morio</i>                    | 1    |
|            |    | <i>Catops neglectus</i>                | 1    |
|            |    | <i>Catops nigricans</i>                | 1    |
|            |    | <i>Catops picipes</i>                  | 37   |
|            |    | <i>Catops subfuscus</i>                | 1    |
|            |    | <i>Choleva cisteloides</i>             | 1    |
|            |    | <i>Choleva lederiana gracilentia</i>   | 6    |
|            |    | <i>Colenis immunda</i>                 | 1    |
|            |    | <i>Cryptophagus montanus</i>           | 1    |
|            |    | <i>Dinaraea angustula</i>              | 1    |

|           |    |                                        |     |
|-----------|----|----------------------------------------|-----|
|           |    | <i>Gabrius breviventer</i>             | 1   |
|           |    | <i>Lesteva longoelytrata</i>           | 1   |
|           |    | <i>Megasternum cf. coccineum</i>       | 1   |
|           |    | <i>Molops piceus</i>                   | 1   |
|           |    | <i>Mycetaea subterranea</i>            | 1   |
|           |    | <i>Nargus velox</i>                    | 16  |
|           |    | <i>Nemadus colonoides</i>              | 1   |
|           |    | <i>Omalium caesum</i>                  | 2   |
|           |    | <i>Othius punctulatus</i>              | 4   |
|           |    | <i>Oxypoda annularis</i>               | 2   |
|           |    | <i>Philonthus decorus</i>              | 1   |
|           |    | <i>Proteinus brachypterus</i>          | 2   |
|           |    | <i>Pterostichus melanarius</i>         | 1   |
|           |    | <i>Quedius limbatus</i>                | 5   |
|           |    | <i>Quedius mesomelinus mesomelinus</i> | 6   |
|           |    | <i>Trechus quadristriatus</i>          | 1   |
|           | S2 | <i>Acidota cruentata</i>               | 1   |
|           |    | <i>Agathidium seminulum</i>            | 1   |
|           |    | <i>Anthobium atrocephalum</i>          | 3   |
|           |    | <i>Atheta gyllenhalii</i>              | 1   |
|           |    | <i>Catops tristis infernus</i>         | 4   |
|           |    | <i>Choleva lederiana gracilenta</i>    | 25  |
|           |    | <i>Cryptophagus punctipennis</i>       | 1   |
|           |    | <i>Dinothenarus fossor</i>             | 1   |
|           |    | <i>Ocalea picata</i>                   | 2   |
|           |    | <i>Phloeonomus punctipennis</i>        | 1   |
|           |    | <i>Quedius mesomelinus mesomelinus</i> | 8   |
|           | S3 | <i>Amphicylis globus</i>               | 1   |
|           |    | <i>Catops tristis infernus</i>         | 17  |
|           |    | <i>Catops picipes</i>                  | 3   |
|           |    | <i>Choleva agilis</i>                  | 1   |
|           |    | <i>Choleva lederiana gracilenta</i>    | 77  |
|           | S4 | <i>Catops tristis infernus</i>         | 16  |
|           |    | <i>Choleva lederiana gracilenta</i>    | 120 |
|           |    | <i>Quedius mesomelinus mesomelinus</i> | 1   |
| KROCZYCKA | S0 | <i>Abax parallelus</i>                 | 2   |
|           |    | <i>Acidota cruentata</i>               | 2   |
|           |    | <i>Anoplotrupes stercorosus</i>        | 5   |
|           |    | <i>Anthobium atrocephalum</i>          | 1   |
|           |    | <i>Atheta sodalis</i>                  | 2   |
|           |    | <i>Brachysomus echinatus</i>           | 2   |
|           |    | <i>Carabus arvensis</i>                | 1   |
|           |    | <i>Carabus intricatus</i>              | 1   |
|           |    | <i>Carabus arvensis</i>                | 1   |
|           |    | <i>Carabus intricatus</i>              | 1   |
|           |    | <i>Cryptophagus punctipennis</i>       | 3   |
|           |    | <i>Liogluta alpestris</i>              | 1   |

|      |    |                                        |   |
|------|----|----------------------------------------|---|
|      |    | <i>Liogluta granigera</i>              | 1 |
|      |    | <i>Othius punctulatus</i>              | 1 |
|      |    | <i>Otiorhynchus raucus</i>             | 1 |
|      |    | <i>Pterostichus oblongopunctatus</i>   | 3 |
|      |    | <i>Tasgius morsitans</i>               | 3 |
|      | S1 | <i>Anoplotrupes stercorosus</i>        | 1 |
|      |    | <i>Atheta sodalis</i>                  | 1 |
|      |    | <i>Carabus arvensis</i>                | 1 |
|      |    | <i>Choleva cisteloides</i>             | 1 |
|      |    | <i>Choleva nivalis</i>                 | 1 |
|      |    | <i>Cryptophagus distinguendus</i>      | 3 |
|      |    | <i>Cryptophagus punctipennis</i>       | 1 |
|      |    | <i>Ischnosoma longicorne</i>           | 1 |
|      |    | <i>Othius subuliformis</i>             | 1 |
|      |    | <i>Quedius mesomelinus mesomelinus</i> | 1 |
|      | S3 | <i>Choleva paskoviensis</i>            | 3 |
|      |    | <i>Liogluta alpestris</i>              | 2 |
|      |    | <i>Othius punctulatus</i>              | 1 |
|      |    | <i>Othius subuliformis</i>             | 3 |
|      |    | <i>Quedius mesomelinus mesomelinus</i> | 2 |
|      | S4 | <i>Cryptophagus distinguendus</i>      | 4 |
|      |    | <i>Otiorhynchus scaber</i>             | 1 |
|      |    | <i>Catops fuscus</i>                   | 2 |
|      |    | <i>Choleva nivalis</i>                 | 1 |
|      |    | <i>Choleva spadicea</i>                | 1 |
|      |    | <i>Anthobium atrocephalum</i>          | 2 |
|      |    | <i>Atheta sodalis</i>                  | 1 |
|      |    | <i>Othius punctulatus</i>              | 1 |
|      |    | <i>Othius subuliformis</i>             | 7 |
|      |    | <i>Quedius mesomelinus mesomelinus</i> | 3 |
|      |    | <i>Xantholinus laevigatus</i>          | 1 |
|      | S5 | <i>Anthobium atrocephalum</i>          | 1 |
|      |    | <i>Catops fuscus</i>                   | 1 |
|      |    | <i>Choleva oblonga</i>                 | 1 |
|      |    | <i>Choleva paskoviensis</i>            | 3 |
|      |    | <i>Cryptophagus punctipennis,</i>      | 1 |
|      |    | <i>Proteinus brachypterus</i>          | 5 |
|      |    | <i>Quedius mesomelinus mesoelinus</i>  | 9 |
| PSIA | S0 | <i>Abax ater</i>                       | 2 |
|      |    | <i>Ademadus strigosus</i>              | 1 |
|      |    | <i>Anoplotrupes stercorosus</i>        | 4 |
|      |    | <i>Anthobium atrocephalum</i>          | 3 |
|      |    | <i>Atheta crassicornis</i>             | 2 |
|      |    | <i>Atheta sodalis</i>                  | 1 |
|      |    | <i>Bryaxis clavicornis</i>             | 1 |
|      |    | <i>Carabus linnaei</i>                 | 1 |
|      |    | <i>Carabus violaceus</i>               | 1 |

|       |    |                                        |    |
|-------|----|----------------------------------------|----|
|       |    | <i>Catops nigrita</i>                  | 2  |
|       |    | <i>Catops picipes</i>                  | 13 |
|       |    | <i>Harpalus laevipes</i>               | 1  |
|       |    | <i>Leptusa ruficollis</i>              | 1  |
|       |    | <i>Nargus velox</i>                    | 1  |
|       |    | <i>Omalium caesum</i>                  | 1  |
|       |    | <i>Oxypoda longiceps</i>               | 1  |
|       |    | <i>Parafoucartia squamulata</i>        | 1  |
|       |    | <i>Ptomaphagus serricatus</i>          | 1  |
|       |    | <i>Ptomaphagus subvilosus</i>          | 1  |
|       |    | <i>Rhizophagus bipustulatus</i>        | 2  |
|       | S1 | <i>Abax parallelus</i>                 | 1  |
|       |    | <i>Atheta sodalis</i>                  | 1  |
|       |    | <i>Athous vittatus</i>                 | 1  |
|       |    | <i>Choleva cisteloides</i>             | 2  |
|       |    | <i>Nargus sp.</i>                      | 1  |
|       |    | <i>Omalium caesum</i>                  | 5  |
|       |    | <i>Pterostichus niger</i>              | 1  |
|       |    | <i>Ptomaphagus sp.</i>                 | 1  |
|       | S2 | <i>Bryaxis puncticollis</i>            | 1  |
|       |    | <i>Catops kirbyi</i>                   | 1  |
|       |    | <i>Choleva cisteloides</i>             | 1  |
|       |    | <i>Cryptophagus distinguendus</i>      | 1  |
|       |    | <i>Omalium validum</i>                 | 1  |
|       | S3 | <i>Quedius mesomelinus mesomelinus</i> | 1  |
| ZEGAR | S0 | <i>Abax ater</i>                       | 3  |
|       |    | <i>Abax ovalis</i>                     | 3  |
|       |    | <i>Aleochara spadicea</i>              | 3  |
|       |    | <i>Anoplotrupes stercorsus</i>         | 23 |
|       |    | <i>Atheta britanniae</i>               | 2  |
|       |    | <i>Atheta vaga</i>                     | 2  |
|       |    | <i>Carabus coriaceus</i>               | 1  |
|       |    | <i>Carabus glabratus</i>               | 1  |
|       |    | <i>Carabus hortensis</i>               | 1  |
|       |    | <i>Carabus linnaei</i>                 | 3  |
|       |    | <i>Carabus nemoralis</i>               | 1  |
|       |    | <i>Catops fuscus</i>                   | 1  |
|       |    | <i>Catops kirbyi</i>                   | 2  |
|       |    | <i>Catops picipes</i>                  | 2  |
|       |    | <i>Cychrus caraboides</i>              | 2  |
|       |    | <i>Haploglossa villosula</i>           | 1  |
|       |    | <i>Nargus anisotomoides</i>            | 2  |
|       |    | <i>Omalium caesum</i>                  | 2  |
|       |    | <i>Pterostichus melanarius</i>         | 3  |
|       |    | <i>Pterostichus niger</i>              | 1  |
|       |    | <i>Ptomaphagus serricatus</i>          | 2  |
|       |    | <i>Rhizophagus sp.</i>                 | 1  |

|  |    |                                        |    |
|--|----|----------------------------------------|----|
|  |    | <i>Stenichnus collaris</i>             | 1  |
|  | S1 | <i>Abax ovalis</i>                     | 1  |
|  |    | <i>Anotylus inustus</i>                | 1  |
|  |    | <i>Anotylus sculpturatus</i>           | 1  |
|  |    | <i>Anthobium atrocephalum</i>          | 4  |
|  |    | <i>Atheta crassicornis</i>             | 1  |
|  |    | <i>Atheta sodalis</i>                  | 3  |
|  |    | <i>Brachysomus echinatus</i>           | 2  |
|  |    | <i>Calathus micropterus</i>            | 1  |
|  |    | <i>Catops fuscus</i>                   | 1  |
|  |    | <i>Catops picipes</i>                  | 11 |
|  |    | <i>Catops subfuscus</i>                | 1  |
|  |    | <i>Choleva bicolor</i>                 | 1  |
|  |    | <i>Choleva glauca</i>                  | 6  |
|  |    | <i>Choleva oblonga</i>                 | 1  |
|  |    | <i>Choleva cisteloides</i>             | 5  |
|  |    | <i>Domene scabricollis</i>             | 1  |
|  |    | <i>Leiodes sp.</i>                     | 1  |
|  |    | <i>Leistus ferrugineus</i>             | 1  |
|  |    | <i>Leistus rufomarginatus</i>          | 1  |
|  |    | <i>Lesteva longoelytrata</i>           | 5  |
|  |    | <i>Nargus wilkini</i>                  | 5  |
|  |    | <i>Ocypus macrocephalus</i>            | 1  |
|  |    | <i>Omalium caesum</i>                  | 9  |
|  |    | <i>Omalium excavatum</i>               | 1  |
|  |    | <i>Othius punctulatus</i>              | 1  |
|  |    | <i>Pterostichus oblongopunctatus</i>   | 1  |
|  |    | <i>Ptomaphagus serricatus</i>          | 3  |
|  |    | <i>Quedius mesomelinus mesomelinus</i> | 2  |
|  |    | <i>Syntomium aeneum</i>                | 5  |
|  |    | <i>Trechus quadristriatus</i>          | 1  |
|  | S2 | <i>Abax parallelus</i>                 | 1  |
|  |    | <i>Catops picipes</i>                  | 4  |
|  |    | <i>Choleva bicolor</i>                 | 1  |
|  |    | <i>Omalium caesum</i>                  | 1  |
|  |    | <i>Omalium validum</i>                 | 5  |
|  |    | <i>Quedius mesomelinus mesomelinus</i> | 3  |
|  | S3 | <i>Atheta sodalis</i>                  | 1  |
|  |    | <i>Bythinus macropalpus</i>            | 1  |
|  |    | <i>Catops picipes</i>                  | 1  |
|  |    | <i>Choleva oblonga</i>                 | 1  |
|  |    | <i>Lesteva longoelytrata</i>           | 1  |
|  |    | <i>Omalium excavatum</i>               | 1  |
|  |    | <i>Omalium rivulare</i>                | 1  |
|  |    | <i>Omalium validum</i>                 | 7  |
|  |    | <i>Quedius mesomelinus mesomelinus</i> | 1  |
|  |    | <i>Tachinus subterraneus</i>           | 3  |
